# Supplementary material for: Controlling the photochromism of zirconium pyromellitic diimide-based metal–organic frameworks through coordinating solvents
Source: Royal Society of Chemistry journal article supplement (doi:10.1039/d4me00104d), 2024-01-01
Supplement: d4me00104d1.pdf [file d4me00104d1.pdf]

## Supplementary Information

### **Controlling the Photochromism of Zirconium Pyromellitic Diimide-Based Metal-Organic Frameworks through Coordinating Solvents**

Youcong Li,<sup>1,+</sup> Jiahao Dong,<sup>1,+</sup> Yue Zhao,<sup>1</sup> Lei Gao,<sup>1</sup> Yu-Hao Gu,<sup>1</sup> Shuai Yuan<sup>1,\*</sup>

<sup>1</sup> State Key Laboratory of Coordination Chemistry, School of Chemistry and Chemical Engineering, Nanjing University, Nanjing, Jiangsu 210023, China.

\*To whom correspondence should be addressed. Email: [syuan@nju.edu.cn](mailto:syuan@nju.edu.cn)

<sup>+</sup>These authors contributed equally to this work

## Materials and Instrumentation

All the reagents and solvents were commercially available and used as received. Deuterated solvents were purchased from Cambridge Isotope Laboratory (Andover, MA). Single-crystal X-ray diffraction intensity data for Zr-PMDI-DMF, Zr-PMDI-NMP, Zr-PMDI-DMSO, and Zr-PMDI-DMAE were collected on a Bruker D8 Venture diffractometer.  $^1\text{H}$  NMR and  $^{13}\text{C}$  NMR were recorded on a Bruker Avance III 400 NMR spectrometer. FT-IR spectra were recorded on a Vector 27 Bruker Spectrophotometer by transmission through KBr pellets containing the ground crystals in the range  $4000 - 400 \text{ cm}^{-1}$ . TGA data were obtained on a TGA 4000 thermal analysis system at a heating rate of  $5 \text{ }^\circ\text{C min}^{-1}$  under an air atmosphere. The powder X-ray diffraction (PXRD) patterns were collected at room temperature using a scan speed of  $0.1 \text{ s/step}$  on a Bruker Advance D8 (40 kV, 40 mA) diffractometer equipped with Cu radiation. UV-vis absorbance spectra were recorded on Shimadzu UV-3600.

## Experimental Section

### Synthesis of H<sub>2</sub>CMPMD

*N,N'*-bis(carboxymethyl)-pyromellitic diimide (H<sub>2</sub>CMPMD) was synthesized according to the literature<sup>1</sup>. <sup>1</sup>H NMR (400 MHz, DMSO-*d*<sub>6</sub>, 20 °C) δ (ppm) 13.38 (s, 2H), 8.36 (s, 2H), 4.40 (s, 4H).

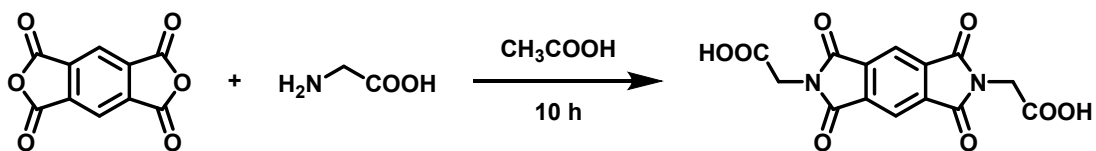

Scheme S1. Synthesis of H<sub>2</sub>CMPMD.

### Synthesis of Zr-PMDI-DMF

A mixture of H<sub>2</sub>CMPMD (10 mg), ZrOCl<sub>2</sub>·8H<sub>2</sub>O (20 mg), and DMF (3 mL) is stirred for 10 min, and then the mixtures are placed in a 15 mL vial and heated at 120 °C for 36 h to yield colorless trigonal crystals. The crystals were collected by filtration and washed with fresh DMF three times (12.9 mg, yield: 82.0%).

### Synthesis of Zr-PMDI-NMP

Crystals of compound Zr-PMDI-DMF (20 mg) were incubated in NMP (10 mL) at room temperature. The supernatant was replaced with fresh NMP (10 mL) every 6 h. After 48 h, the crystals were collected by filtration (12.7 mg, yield: 70.2 %).

### Synthesis of Zr-PMDI-DMSO

Crystals of compound Zr-PMDI-DMF (20 mg) were incubated in DMSO (10 mL) at room temperature. The supernatant was replaced with fresh DMSO (10 mL) every 6 h. After 48 h, the crystals were collected by filtration (14.1 mg, yield: 78.82 %).

### Synthesis of Zr-PMDI-DMAE

Crystals of compound Zr-PMDI-DMF (20 mg) were incubated in DMAE (10 mL) at room temperature. The supernatant was replaced with fresh DMAE (10 mL) every 6 h. After 48 h, the crystals were collected by filtration (14.5 mg, yield: 70.9 %).

## Single Crystal X-Ray Crystallography

Single-crystal X-ray diffraction intensity data for Zr-PMDI-DMF, Zr-PMDI-NMP, Zr-PMDI-DMSO, and Zr-PMDI-DMAE were collected on a Bruker D8 Venture diffractometer fitted with a PHOTON-100 CMOS detector, monochromatized microfocus Mo K $\alpha$  radiation ( $\lambda = 0.71073 \text{ \AA}$ ), and a nitrogen flow controlled by a KRYOFLEX II low-temperature attachment operating at 193 K. Raw data collection and reduction were controlled using APEX3 software.<sup>2</sup> The structures were solved by direct methods and refined by full-matrix least-squares on  $F^2$  using the SHELXTL software package.<sup>3</sup>

## DFT calculation for Zr-PMDI

For each solvent@MOF combination, 100 initial geometries were generated using the Kick stochastic structure generator. Positions of the solvent molecules were optimized using DFTB,<sup>4,5</sup> keeping the framework fixed at the experimental geometry. The optimized structures were ranked in terms of energy and the energy levels of the HOMO and LUMO were extracted for the lowest energy structure of each solvent@MOF system.

To generate cube files for the frontier orbitals, single-point calculations of the DFTB-optimized geometry in periodic boundary conditions were performed at the DFT level. Density functional theory (DFT) was applied within the generalized gradient approximation, using the PBE GGA functional.

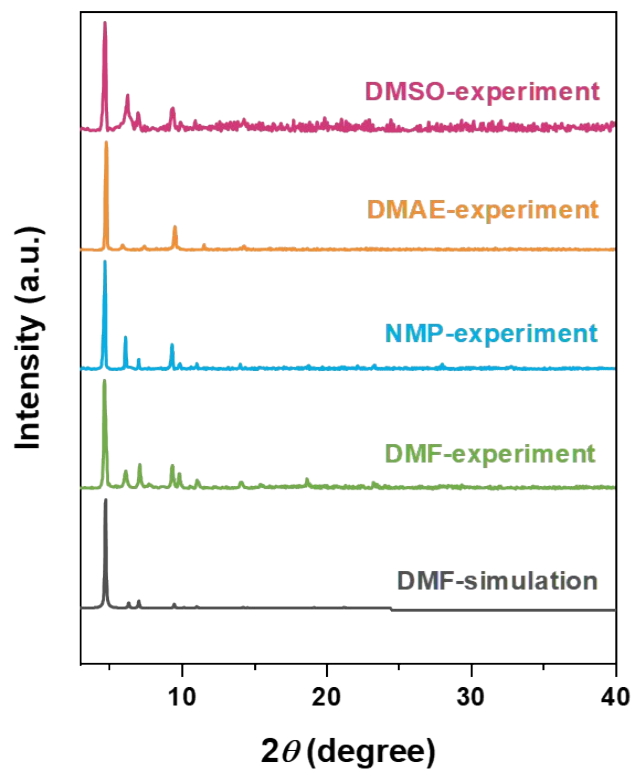

**Figure S1.** PXRD patterns of Zr-PMDI-DMF simulation from the X-ray single-crystal structures, as-synthesized sample, and the PXRD patterns of Zr-PMDI-DMF after soaking in NMP, DMAE, DMSO solution at room temperature for 48 h.

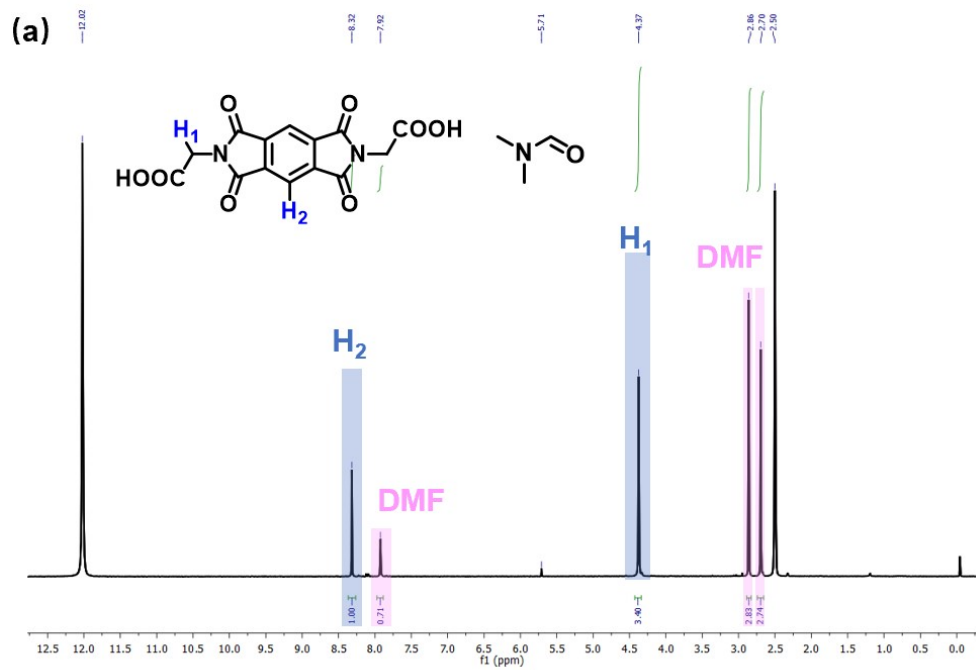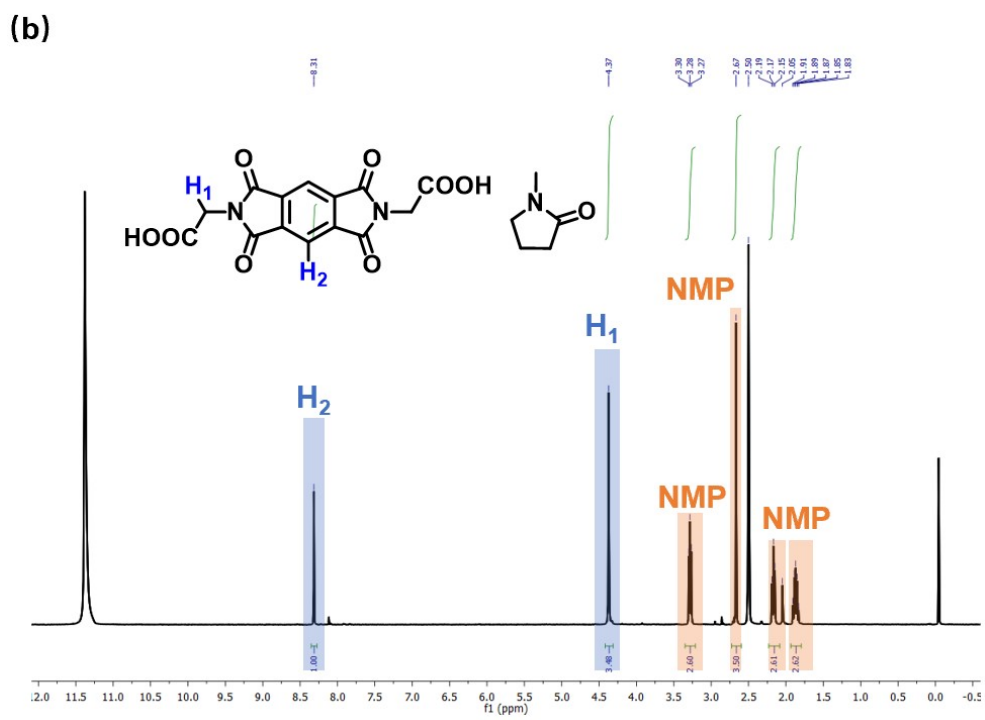

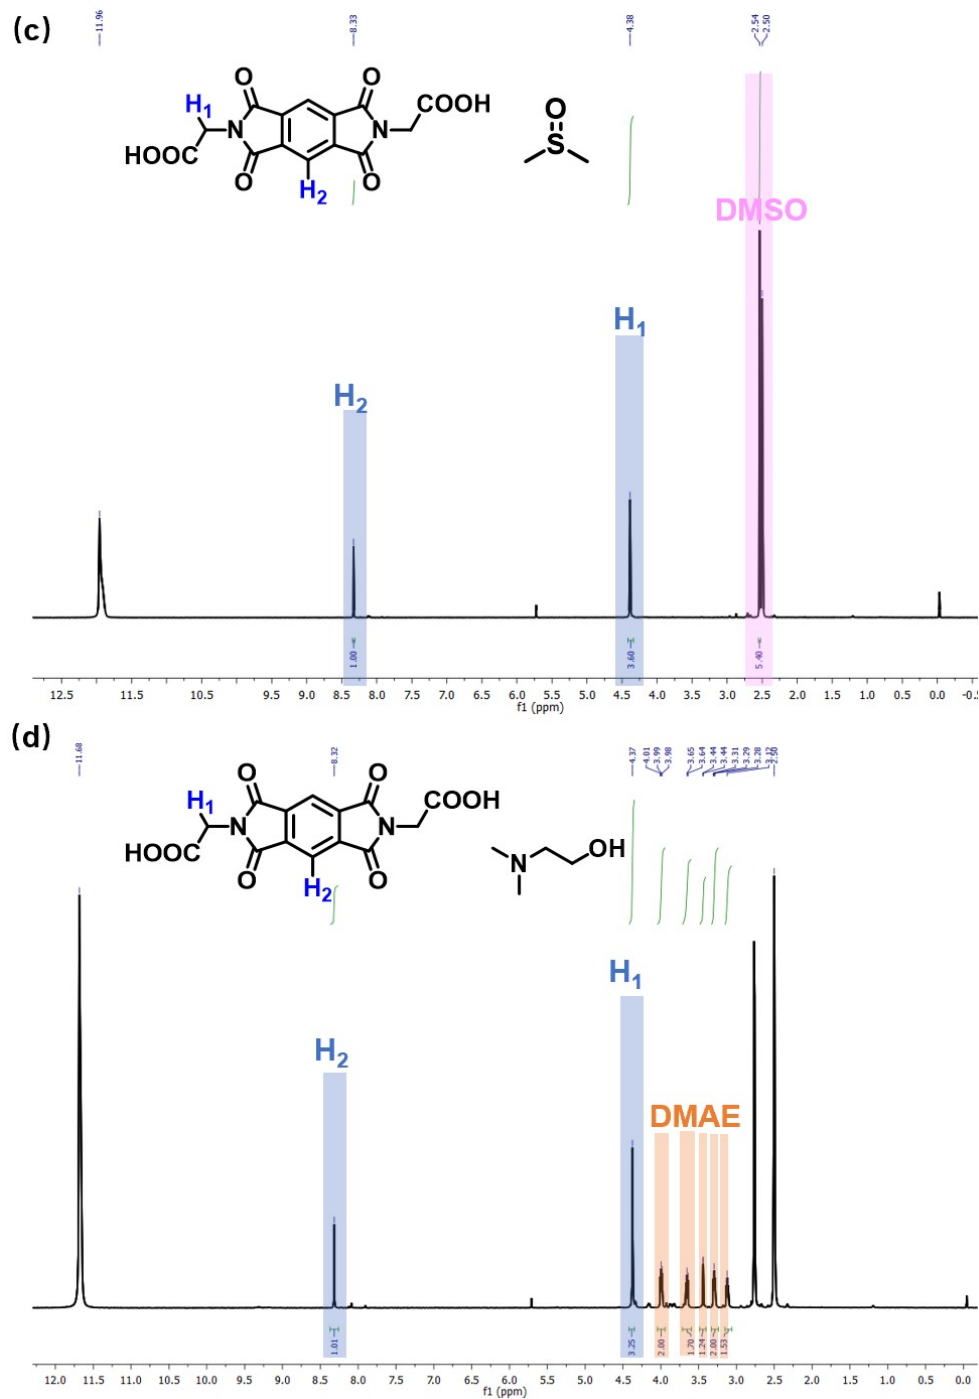

**Figure S2.** (a)  $^1\text{H}$ -NMR spectrum of digested Zr-PMDI-DMF. (b)  $^1\text{H}$ -NMR spectrum of digested Zr-PMDI-NMP showing complete conversion from Zr-PMDI-DMF to Zr-PMDI-NMP. (c)  $^1\text{H}$ -NMR spectrum of digested Zr-PMDI-DMSO showing complete conversion from Zr-PMDI-DMF to Zr-PMDI-DMSO. (d)  $^1\text{H}$ -NMR spectrum of digested Zr-PMDI-DMAE showing complete conversion from Zr-PMDI-DMF to Zr-PMDI-DMAE.

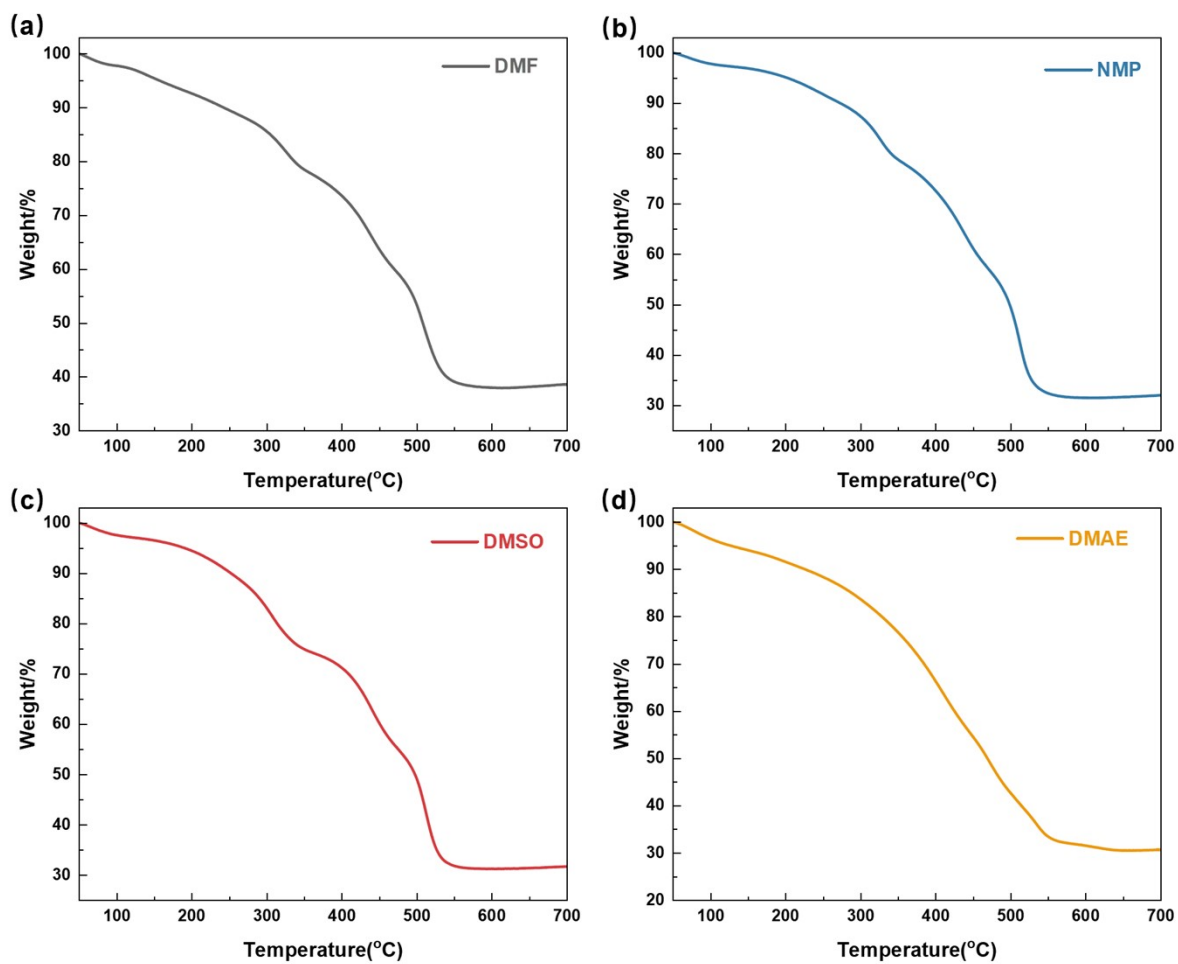

**Figure S3.** Thermo-gravimetric of Zr-PMDI-DMF (a), Zr-PMDI-NMP (b), Zr-PMDI-DMSO (c), and Zr-PMDI-DMAE (d).



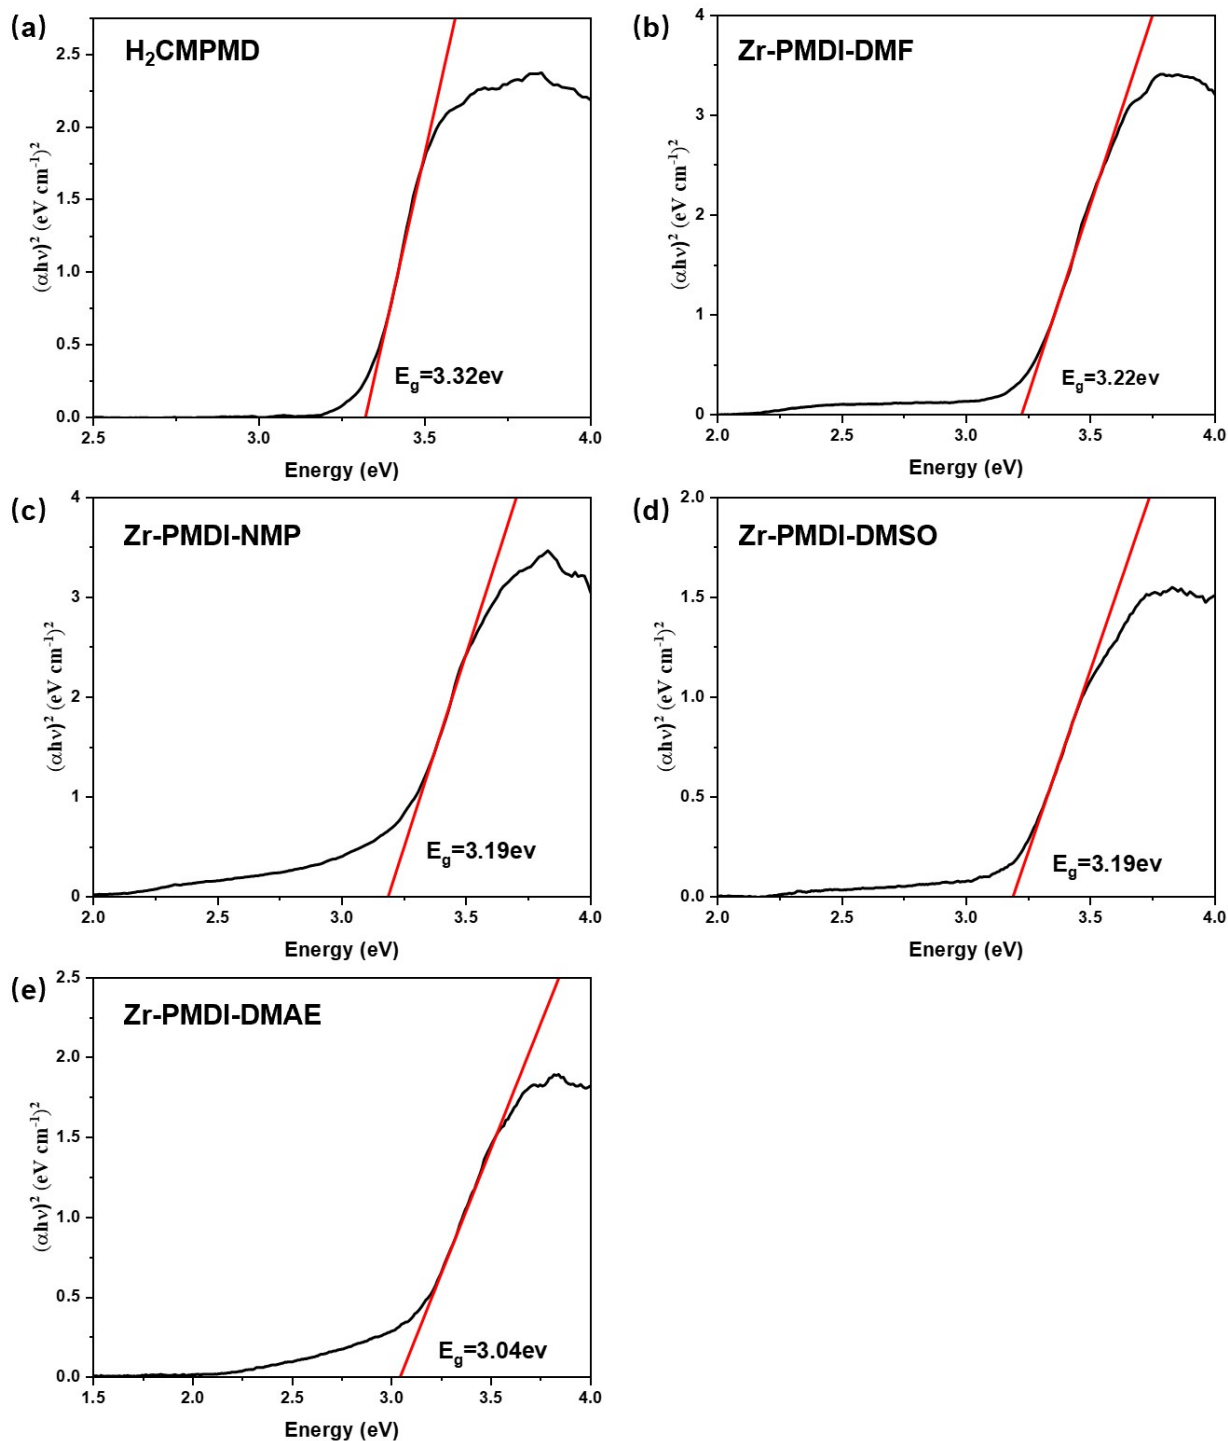

**Figure S4.** (a) The optical band gaps of H<sub>2</sub>CMPMD; (b) The optical band gaps of Zr-PMDI-DMF; (c) The optical band gaps of Zr-PMDI-NMP; (d) The optical band gaps of Zr-PMDI-DMSO; (e) The optical band gaps of Zr-PMDI-DMAE.

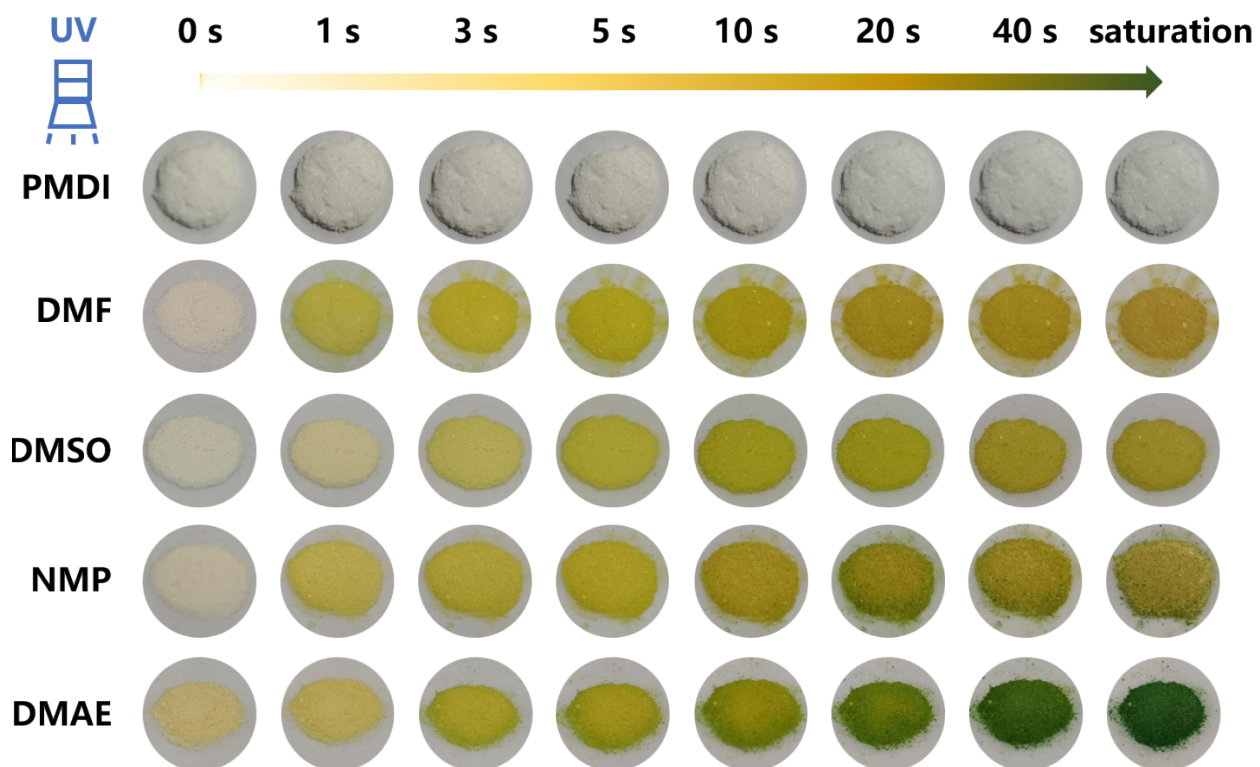

**Figure S5.** Photographs of the color transition process under a 365 nm UV light for PMDI, Zr-PMDI-DMF, Zr-PMDI-NMP, Zr-PMDI-DMSO, and Zr-PMDI-DMAE.

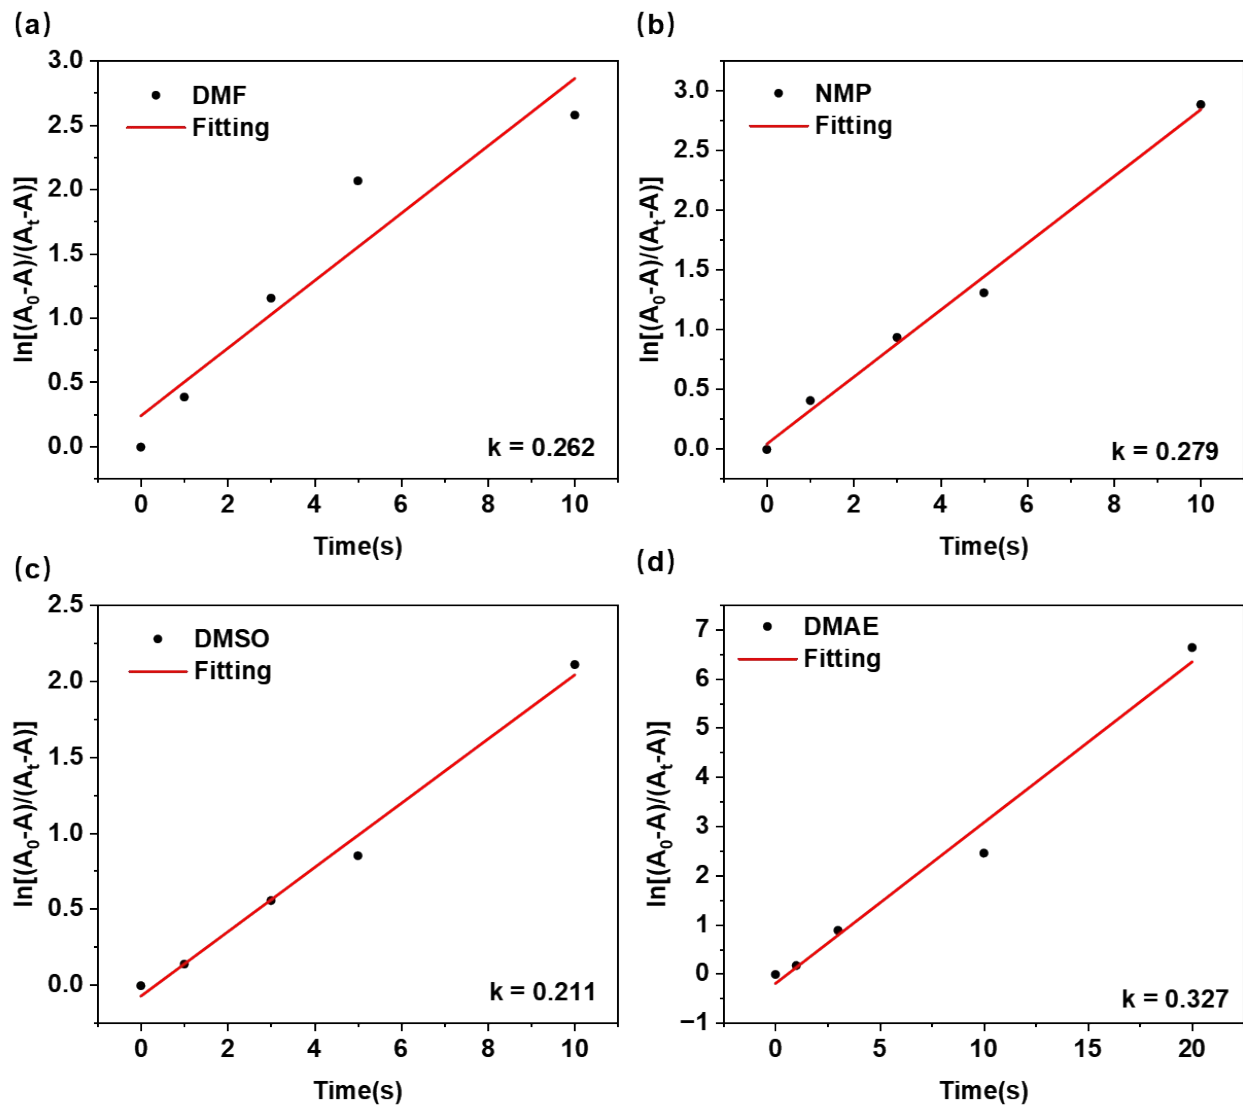

**Figure S6.** Kinetic curves for Zr-PMDI-DMF (a), Zr-PMDI-NMP (b), Zr-PMDI-DMSO (c), and Zr-PMDI-DMAE (d).

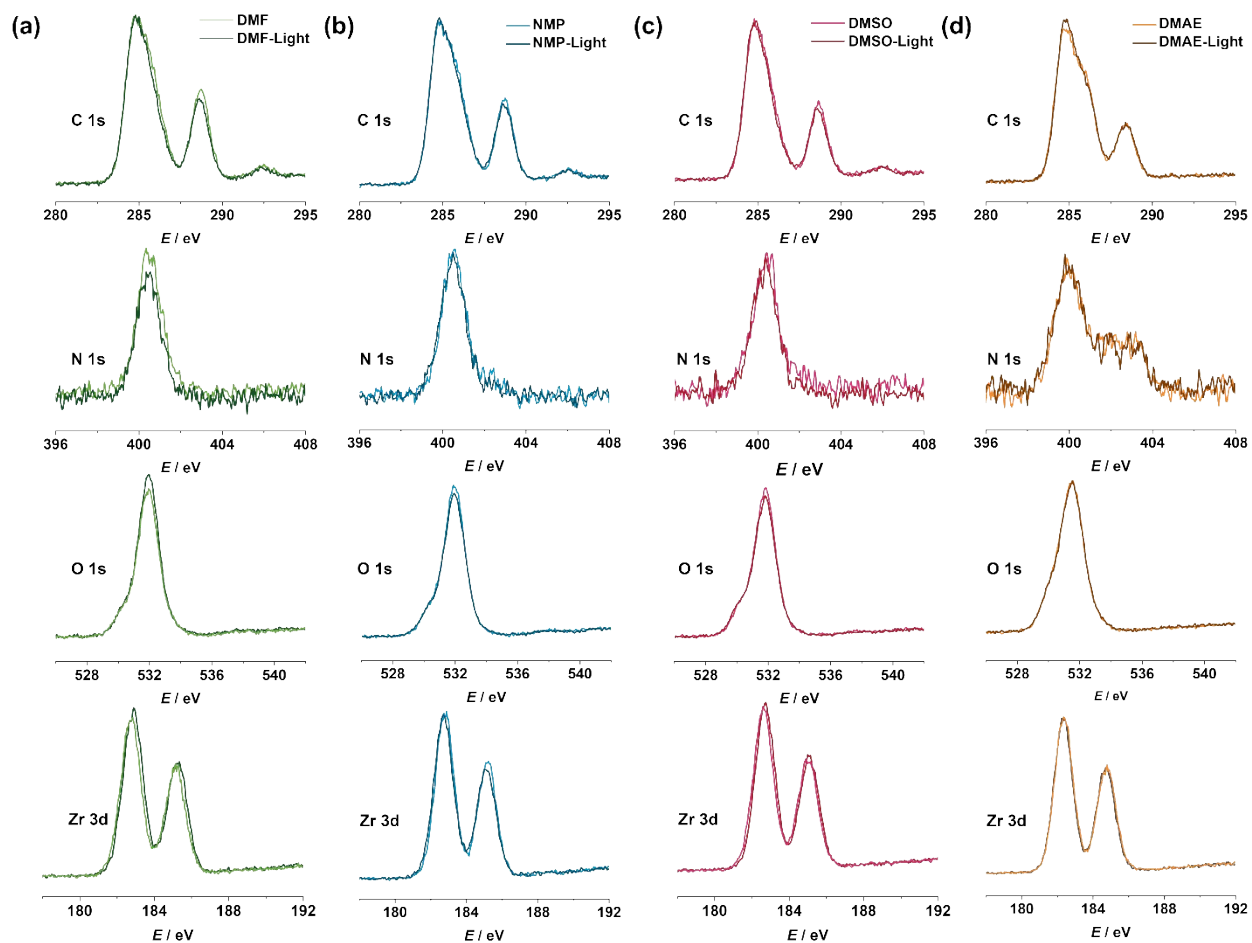

**Figure S7.** XPS spectra of Zr-PMDI-DMF and Zr-PMDI-DMF-Light (a), Zr-PMDI-NMP and Zr-PMDI-NMP-Light (b), Zr-PMDI-DMSO and Zr-PMDI-DMSO-Light (c), Zr-PMDI-DMAE and Zr-PMDI-DMAE-Light (d).

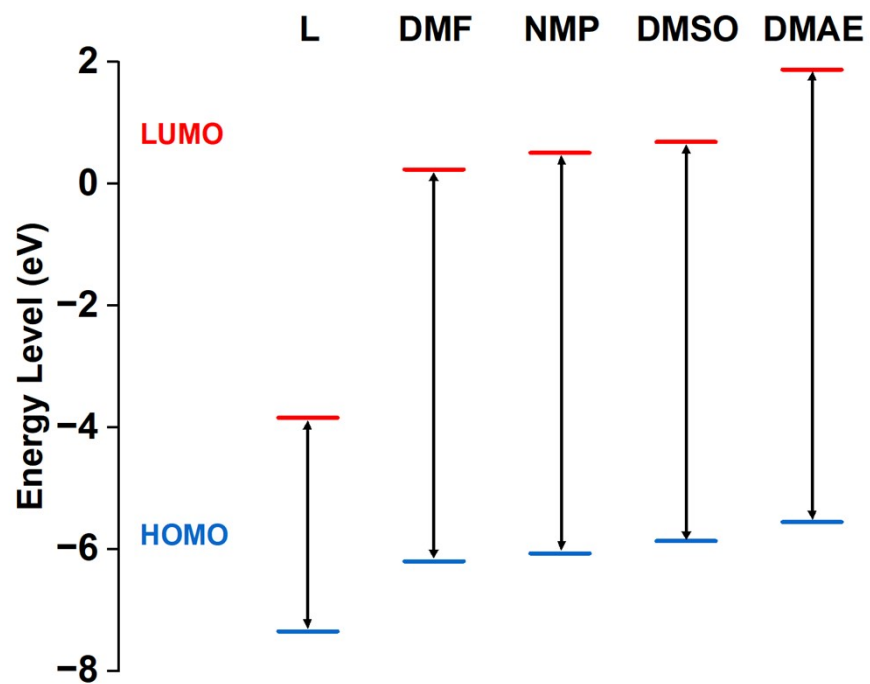

**Figure S8.** HOMO and LUMO energy levels of the PMDI ligand, DMF, NMP, DMSO, and DMAE.

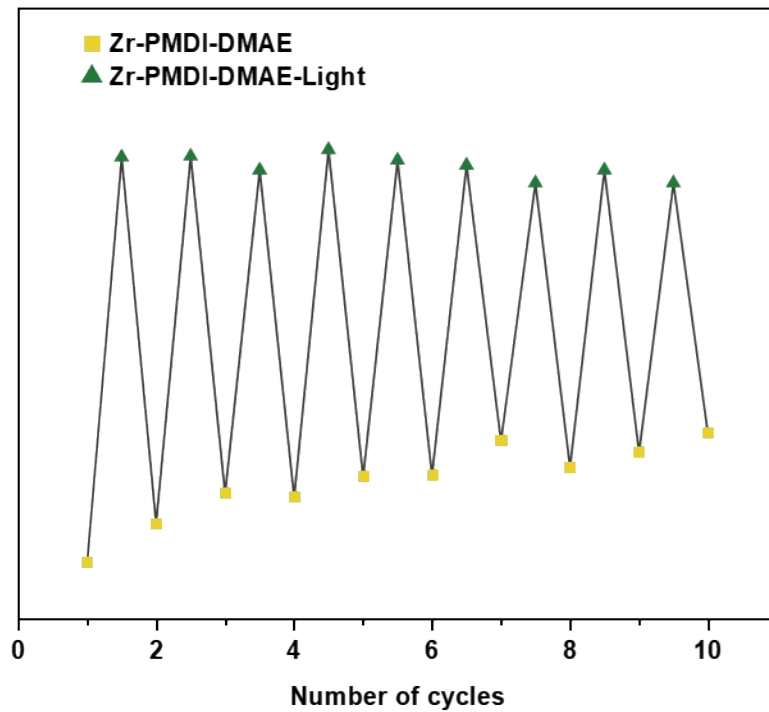

**Figure S9.** The repeated cycles of Zr-PMDI-DMAE and Zr-PMDI-DMAE-Light (based on absorbance at  $\lambda = 712$  nm).

## Single Crystal X-Ray Crystallography

**Table S1** Crystal data and structure refinement parameters of Zr-PMDI-DMF, Zr-PMDI-NMP, and Zr-PMDI-DMSO.

| Name                                                                         | Zr-PMDI-DMF                                                                      | Zr-PMDI-NMP                                                                             | Zr-PMDI-DMSO                                                                                       |
|------------------------------------------------------------------------------|----------------------------------------------------------------------------------|-----------------------------------------------------------------------------------------|----------------------------------------------------------------------------------------------------|
| CCDC                                                                         | 2364996                                                                          | 2364997                                                                                 | 2364998                                                                                            |
| Empirical formula                                                            | C <sub>102</sub> H <sub>84</sub> N <sub>18</sub> O <sub>63</sub> Zr <sub>6</sub> | C <sub>91.5</sub> H <sub>53.5</sub> N <sub>13.5</sub> O <sub>58.5</sub> Zr <sub>6</sub> | C <sub>87</sub> H <sub>51</sub> N <sub>12</sub> O <sub>58.5</sub> S <sub>1.5</sub> Zr <sub>6</sub> |
| Formula weight                                                               | 3117.19                                                                          | 2825.29                                                                                 | 2795.80                                                                                            |
| Temperature/K                                                                | 193.00                                                                           | 193.00                                                                                  | 193.00                                                                                             |
| Crystal system                                                               | trigonal                                                                         | trigonal                                                                                | trigonal                                                                                           |
| Space group                                                                  | <i>R</i> -3                                                                      | <i>R</i> -3                                                                             | <i>R</i> -3                                                                                        |
| <i>a</i> /Å                                                                  | 27.698(4)                                                                        | 29.134(5)                                                                               | 29.323(4)                                                                                          |
| <i>b</i> /Å                                                                  | 27.698(4)                                                                        | 29.134(5)                                                                               | 29.323(4)                                                                                          |
| <i>c</i> /Å                                                                  | 29.419(6)                                                                        | 27.351(7)                                                                               | 27.527(6)                                                                                          |
| $\alpha$ /°                                                                  | 90                                                                               | 90                                                                                      | 90                                                                                                 |
| $\beta$ /°                                                                   | 90                                                                               | 90                                                                                      | 90                                                                                                 |
| $\gamma$ /°                                                                  | 120                                                                              | 120                                                                                     | 120                                                                                                |
| <i>V</i> /Å <sup>3</sup>                                                     | 19546(7)                                                                         | 20105(8)                                                                                | 20499(7)                                                                                           |
| <i>Z</i>                                                                     | 3                                                                                | 3                                                                                       | 3                                                                                                  |
| $\rho_{\text{calc}}$ /gcm <sup>-3</sup>                                      | 0.794                                                                            | 0.700                                                                                   | 0.679                                                                                              |
| $\mu$ /mm <sup>-1</sup>                                                      | 1.567                                                                            | 0.270                                                                                   | 0.275                                                                                              |
| <i>F</i> (000)                                                               | 4698.0                                                                           | 4215.0                                                                                  | 4167.0                                                                                             |
| Crystal size/mm <sup>3</sup>                                                 | 0.12 × 0.1 × 0.08                                                                | 0.12 × 0.1 × 0.08                                                                       | 0.12 × 0.1 × 0.08                                                                                  |
| Radiation                                                                    | MoK $\alpha$ ( $\lambda$ = 0.71073)                                              | MoK $\alpha$ ( $\lambda$ = 0.71073)                                                     | MoK $\alpha$ ( $\lambda$ = 0.71073)                                                                |
| 2 $\theta$ range for data collection/°                                       | 5.552 to 107.806                                                                 | 4.844 to 51.232                                                                         | 4.44 to 50.88                                                                                      |
| Index ranges                                                                 | -33 ≤ <i>h</i> ≤ 30, -33 ≤ <i>k</i> ≤ 33, -30 ≤ <i>l</i> ≤ 35                    | -35 ≤ <i>h</i> ≤ 32, -35 ≤ <i>k</i> ≤ 35, -33 ≤ <i>l</i> ≤ 33                           | -35 ≤ <i>h</i> ≤ 35, -35 ≤ <i>k</i> ≤ 35, -33 ≤ <i>l</i> ≤ 33                                      |
| Reflections collected                                                        | 46385                                                                            | 140447                                                                                  | 129121                                                                                             |
| Independent reflections                                                      | 7957 [ <i>R</i> <sub>int</sub> = 0.1034, <i>R</i> <sub>sigma</sub> = 0.0696]     | 8346 [ <i>R</i> <sub>int</sub> = 0.1630, <i>R</i> <sub>sigma</sub> = 0.0637]            | 8419 [ <i>R</i> <sub>int</sub> = 0.1781, <i>R</i> <sub>sigma</sub> = 0.0584]                       |
| Data/restraints/parameters                                                   | 7957/16/289                                                                      | 8346/149/332                                                                            | 8419/495/7345                                                                                      |
| Goodness-of-fit on <i>F</i> <sup>2</sup>                                     | 0.910                                                                            | 1.057                                                                                   | 1.143                                                                                              |
| Final <i>R</i> indexes [ <i>I</i> >= 2 $\sigma$ ( <i>I</i> )] <sup>a,b</sup> | <i>R</i> <sub>1</sub> = 0.0924, <i>wR</i> <sub>2</sub> = 0.2732                  | <i>R</i> <sub>1</sub> = 0.0984, <i>wR</i> <sub>2</sub> = 0.2762                         | <i>R</i> <sub>1</sub> = 0.1175, <i>wR</i> <sub>2</sub> = 0.3087                                    |
| Final <i>R</i> indexes [all data] <sup>a,b</sup>                             | <i>R</i> <sub>1</sub> = 0.1338, <i>wR</i> <sub>2</sub> = 0.3208                  | <i>R</i> <sub>1</sub> = 0.1323, <i>wR</i> <sub>2</sub> = 0.3122                         | <i>R</i> <sub>1</sub> = 0.1539, <i>wR</i> <sub>2</sub> = 0.3383                                    |
| Largest diff. peak/hole / e Å <sup>-3</sup>                                  | 0.95/-0.79                                                                       | 1.71/-1.17                                                                              | 2.09/-1.47                                                                                         |

<sup>a</sup>  $R_1 = \frac{\sum ||F_o| - |F_c||}{\sum |F_o|}$

<sup>b</sup>  $wR_2 = \frac{\sum w(|F_o|^2 - |F_c|^2)}{\sum w(F_o^2)^{1/2}}$

**Table S2** Theoretical calculation of the energy levels of Crystal data and structure refinement parameters of the PMDI ligand, DMF, NMP, DMSO, and DMAE.

| compound | HOMO (eV) | LUMO (eV) |
|----------|-----------|-----------|
| PMDI     | -7.346    | -3.839    |
| DMF      | -6.197    | 0.237     |
| NMP      | -6.067    | 0.511     |
| DMSO     | -5.862    | 0.689     |
| DMAE     | -5.552    | 1.875     |



## REFERENCES

- (1) Barooah, N.; Sarma, R. J.; Baruah, J. B. Solid-state hydrogen bonded assembly of N,N'-bis(glycinyl)-pyromellitic diimide with aromatic guests. *CrystEngComm* **2006**, *8*(8), 608-615.
- (2) Gorbitz, C. What is the best crystal size for collection of X-ray data? Refinement of the structure of glycyl-l-serine based on data from a very large crystal. *Acta Crystallographica Section B* **1999**, *55*(6), 1090-1098.
- (3) Sheldrick, G. A short history of SHELX. *Acta Crystallographica Section A* **2008**, *64*(1), 112-122.
- (4) Aradi, B.; Hourahine, B.; Frauenheim, T. DFTB+, a Sparse Matrix-Based Implementation of the DFTB Method. *The Journal of Physical Chemistry A* **2007**, *111*(26), 5678-5684.
- (5) Wahiduzzaman, M.; Oliveira, A. F.; Philipsen, P.; Zhechkov, L.; van Lenthe, E.; Witek, H. A.; Heine, T. DFTB Parameters for the Periodic Table: Part 1, Electronic Structure. *J. Chem. Theory Comput.* **2013**, *9*(9), 4006-4017.
